# Supplementary material
Source: MDPI journal article supplement (https://www.mdpi.com/2073-4395/14/2/344)
Supplement: s1 [file s1]

| Maize phenological stage dataset in Huang Huai Hai region |                   |                 |     |     |     |     |     |     |     |
|-----------------------------------------------------------|-------------------|-----------------|-----|-----|-----|-----|-----|-----|-----|
| Latitude<br>(°N)                                          | Longitude<br>(°E) | Day of year (d) |     |     |     |     |     |     |     |
|                                                           |                   | SW              | VE  | V3  | JT  | VT  | FR  | R1  | R6  |
| 34.82                                                     | 114.67            | 158             | 165 | 169 | 190 | 217 | 219 | 220 | 271 |
| 35.43                                                     | 115.17            | 166             | 171 | 174 | 197 | 215 | 217 | 218 | 271 |
| 34.28                                                     | 117.40            | 167             | 172 | 177 | 197 | 219 | 221 | 222 | 272 |
| 32.87                                                     | 117.55            | 166             | 172 | 178 | 192 | 216 | 218 | 219 | 259 |
| 33.12                                                     | 115.28            | 161             | 166 | 172 | 186 | 208 | 210 | 211 | 264 |
| 33.40                                                     | 115.33            | 161             | 166 | 172 | 186 | 208 | 210 | 211 | 264 |
| 33.03                                                     | 115.37            | 163             | 165 | 171 | 185 | 208 | 210 | 211 | 264 |
| 33.00                                                     | 115.30            | 160             | 168 | 173 | 186 | 209 | 211 | 212 | 264 |
| 39.43                                                     | 117.55            | 162             | 167 | 172 | 203 | 216 | 218 | 219 | 277 |
| 37.62                                                     | 116.43            | 142             | 149 | 158 | 186 | 220 | 222 | 223 | 258 |
| 40.02                                                     | 114.20            | 155             | 160 | 167 | 199 | 200 | 202 | 203 | 251 |
| 39.70                                                     | 115.67            | 174             | 178 | 184 | 200 | 227 | 229 | 230 | 263 |
| 39.47                                                     | 117.02            | 174             | 180 | 183 | 204 | 226 | 228 | 229 | 274 |
| 36.97                                                     | 116.02            | 161             | 166 | 173 | 202 | 212 | 214 | 215 | 259 |
| 35.20                                                     | 118.88            | 161             | 167 | 174 | 194 | 212 | 214 | 215 | 275 |
| 35.15                                                     | 119.32            | 171             | 176 | 182 | 194 | 222 | 224 | 225 | 276 |
| 36.48                                                     | 115.98            | 166             | 172 | 177 | 196 | 227 | 229 | 230 | 263 |
| 35.45                                                     | 116.58            | 163             | 178 | 181 | 193 | 217 | 219 | 220 | 281 |
| 38.23                                                     | 116.97            | 163             | 169 | 175 | 197 | 217 | 219 | 220 | 267 |
| 34.78                                                     | 113.38            | 161             | 166 | 169 | 191 | 217 | 219 | 220 | 274 |
| 33.58                                                     | 114.00            | 166             | 172 | 177 | 189 | 217 | 219 | 220 | 279 |
| 34.92                                                     | 113.60            | 161             | 167 | 170 | 190 | 218 | 220 | 221 | 271 |
| 34.93                                                     | 113.00            | 157             | 162 | 166 | 187 | 215 | 217 | 218 | 260 |
| 34.10                                                     | 114.00            | 154             | 160 | 165 | 187 | 209 | 211 | 212 | 270 |
| 33.73                                                     | 114.42            | 162             | 167 | 172 | 192 | 215 | 217 | 218 | 264 |
| 32.98                                                     | 112.55            | 156             | 170 | 174 | 183 | 212 | 214 | 215 | 258 |
| 39.13                                                     | 115.67            | 175             | 181 | 192 | 211 | 214 | 216 | 217 | 261 |
| 35.45                                                     | 116.58            | 171             | 178 | 181 | 193 | 217 | 219 | 220 | 281 |
| 33.72                                                     | 117.13            | 165             | 172 | 179 | 196 | 213 | 215 | 216 | 281 |
| 35.22                                                     | 113.22            | 160             | 166 | 170 | 196 | 213 | 215 | 216 | 262 |
| 33.65                                                     | 117.48            | 175             | 180 | 185 | 198 | 221 | 223 | 224 | 280 |
| 34.60                                                     | 116.37            | 168             | 174 | 177 | 206 | 213 | 215 | 216 | 265 |
| 36.75                                                     | 117.45            | 165             | 171 | 178 | 206 | 220 | 222 | 223 | 268 |
| 38.87                                                     | 115.47            | 175             | 180 | 182 | 206 | 222 | 224 | 225 | 270 |
| 39.02                                                     | 115.57            | 161             | 167 | 176 | 203 | 218 | 220 | 221 | 264 |
| 39.13                                                     | 115.67            | 175             | 181 | 192 | 211 | 214 | 216 | 217 | 261 |
| 35.23                                                     | 115.47            | 161             | 170 | 173 | 192 | 212 | 214 | 215 | 255 |
| 41.15                                                     | 114.70            | 170             | 176 | 180 | 206 | 220 | 222 | 223 | 255 |
| 39.83                                                     | 114.57            | 170             | 175 | 181 | 210 | 233 | 235 | 236 | 284 |
| 38.03                                                     | 114.42            | 165             | 172 | 178 | 210 | 228 | 230 | 231 | 269 |
| 37.07                                                     | 114.50            | 163             | 170 | 175 | 202 | 222 | 224 | 225 | 264 |
| 36.05                                                     | 114.40            | 160             | 167 | 170 | 198 | 220 | 222 | 223 | 263 |
| 35.32                                                     | 113.88            | 156             | 163 | 166 | 196 | 220 | 222 | 223 | 262 |
| 41.22                                                     | 116.63            | 170             | 176 | 180 | 190 | 218 | 220 | 221 | 260 |
| 41.93                                                     | 117.75            | 170             | 177 | 180 | 210 | 233 | 235 | 236 | 285 |
| 40.78                                                     | 114.88            | 170             | 175 | 180 | 210 | 233 | 235 | 236 | 276 |
| 40.40                                                     | 115.50            | 170             | 176 | 181 | 210 | 233 | 235 | 236 | 275 |

|       |        |     |     |     |     |     |     |     |     |
|-------|--------|-----|-----|-----|-----|-----|-----|-----|-----|
| 40.38 | 116.87 | 170 | 176 | 180 | 208 | 230 | 232 | 233 | 271 |
| 40.98 | 117.95 | 170 | 177 | 180 | 205 | 230 | 232 | 233 | 270 |
| 40.20 | 117.95 | 170 | 177 | 180 | 210 | 233 | 235 | 236 | 277 |
| 40.40 | 118.95 | 170 | 177 | 178 | 210 | 230 | 232 | 233 | 270 |
| 39.85 | 119.52 | 170 | 177 | 177 | 210 | 233 | 235 | 236 | 276 |
| 39.80 | 116.47 | 170 | 177 | 180 | 210 | 233 | 235 | 236 | 274 |
| 39.12 | 116.38 | 166 | 174 | 180 | 205 | 230 | 232 | 233 | 268 |
| 39.08 | 117.07 | 165 | 172 | 177 | 205 | 223 | 225 | 226 | 266 |
| 39.67 | 118.15 | 166 | 173 | 177 | 205 | 230 | 232 | 233 | 275 |
| 39.43 | 118.88 | 166 | 173 | 176 | 208 | 230 | 232 | 233 | 270 |
| 38.85 | 115.52 | 165 | 172 | 176 | 208 | 230 | 232 | 233 | 270 |
| 38.23 | 115.73 | 165 | 171 | 178 | 204 | 222 | 224 | 225 | 265 |
| 38.33 | 116.83 | 165 | 171 | 177 | 200 | 220 | 222 | 223 | 264 |
| 39.05 | 117.72 | 165 | 171 | 176 | 200 | 222 | 224 | 225 | 265 |
| 38.37 | 117.35 | 165 | 171 | 176 | 205 | 230 | 232 | 233 | 276 |
| 37.37 | 115.38 | 163 | 170 | 176 | 200 | 223 | 225 | 226 | 259 |
| 37.43 | 116.32 | 165 | 170 | 177 | 198 | 220 | 222 | 223 | 261 |
| 37.48 | 117.53 | 165 | 170 | 175 | 197 | 220 | 222 | 223 | 263 |
| 37.43 | 118.67 | 165 | 171 | 176 | 198 | 222 | 224 | 225 | 264 |
| 36.23 | 115.67 | 160 | 167 | 172 | 200 | 223 | 225 | 226 | 266 |
| 36.60 | 117.05 | 163 | 169 | 175 | 193 | 218 | 220 | 221 | 257 |
| 36.17 | 117.15 | 161 | 168 | 172 | 196 | 220 | 222 | 223 | 263 |
| 36.83 | 118.00 | 165 | 171 | 177 | 195 | 218 | 220 | 221 | 257 |
| 36.18 | 118.15 | 162 | 168 | 174 | 196 | 220 | 222 | 223 | 263 |
| 36.75 | 119.18 | 166 | 173 | 178 | 195 | 220 | 222 | 223 | 260 |
| 36.97 | 120.73 | 170 | 176 | 181 | 200 | 222 | 224 | 225 | 265 |
| 36.77 | 121.18 | 170 | 176 | 181 | 200 | 223 | 225 | 226 | 266 |
| 35.25 | 115.43 | 155 | 165 | 169 | 200 | 223 | 225 | 226 | 265 |
| 35.57 | 116.85 | 158 | 165 | 169 | 190 | 213 | 215 | 216 | 253 |
| 35.58 | 118.83 | 160 | 166 | 173 | 193 | 216 | 218 | 219 | 266 |
| 35.05 | 118.35 | 156 | 162 | 169 | 195 | 218 | 220 | 221 | 259 |
| 35.43 | 119.53 | 160 | 166 | 173 | 193 | 216 | 218 | 219 | 255 |
| 34.05 | 111.03 | 155 | 162 | 167 | 195 | 218 | 220 | 221 | 260 |
| 34.82 | 112.43 | 156 | 162 | 167 | 190 | 215 | 217 | 218 | 258 |
| 33.78 | 111.60 | 153 | 160 | 166 | 190 | 218 | 220 | 221 | 263 |
| 34.72 | 113.65 | 155 | 161 | 165 | 190 | 213 | 215 | 216 | 251 |
| 34.03 | 113.87 | 153 | 159 | 164 | 188 | 218 | 220 | 221 | 263 |
| 34.78 | 114.30 | 155 | 162 | 166 | 186 | 213 | 215 | 216 | 259 |
| 33.30 | 111.50 | 150 | 158 | 164 | 188 | 218 | 220 | 221 | 263 |
| 33.03 | 112.58 | 152 | 165 | 170 | 188 | 213 | 215 | 216 | 250 |
| 33.88 | 113.05 | 153 | 160 | 165 | 185 | 213 | 215 | 216 | 254 |
| 33.78 | 114.52 | 150 | 156 | 162 | 186 | 215 | 217 | 218 | 257 |
| 33.00 | 114.02 | 150 | 165 | 173 | 187 | 215 | 217 | 218 | 258 |
| 32.13 | 114.05 | 145 | 152 | 159 | 183 | 213 | 215 | 216 | 253 |
| 34.45 | 115.67 | 152 | 159 | 164 | 183 | 205 | 207 | 208 | 244 |
| 34.43 | 116.33 | 152 | 159 | 164 | 187 | 215 | 217 | 218 | 262 |
| 34.28 | 117.15 | 152 | 158 | 165 | 191 | 215 | 217 | 218 | 256 |
| 34.83 | 119.12 | 156 | 162 | 170 | 190 | 213 | 215 | 216 | 253 |
| 33.87 | 115.77 | 150 | 160 | 168 | 190 | 213 | 215 | 216 | 259 |
| 33.63 | 116.98 | 150 | 158 | 167 | 200 | 213 | 215 | 216 | 267 |

|       |        |     |     |     |     |     |     |     |     |
|-------|--------|-----|-----|-----|-----|-----|-----|-----|-----|
| 32.98 | 118.52 | 148 | 155 | 162 | 199 | 210 | 212 | 213 | 260 |
| 33.60 | 119.03 | 150 | 156 | 165 | 185 | 208 | 210 | 211 | 250 |
| 33.77 | 120.25 | 153 | 159 | 167 | 186 | 210 | 212 | 213 | 255 |
| 32.87 | 115.73 | 148 | 154 | 161 | 186 | 212 | 214 | 215 | 257 |
| 32.17 | 115.62 | 145 | 151 | 158 | 184 | 208 | 210 | 211 | 248 |
| 32.55 | 116.78 | 145 | 151 | 159 | 183 | 205 | 207 | 208 | 248 |
| 32.92 | 117.38 | 148 | 155 | 163 | 183 | 205 | 207 | 208 | 249 |
| 32.30 | 118.30 | 145 | 152 | 159 | 185 | 209 | 211 | 212 | 253 |
| 32.80 | 119.45 | 148 | 155 | 163 | 180 | 205 | 207 | 208 | 245 |
| 32.87 | 120.32 | 148 | 155 | 163 | 183 | 208 | 210 | 211 | 254 |
| 31.98 | 120.88 | 146 | 153 | 161 | 183 | 208 | 210 | 211 | 252 |
| 32.07 | 121.60 | 146 | 153 | 161 | 180 | 205 | 207 | 208 | 246 |
| 31.75 | 116.50 | 145 | 151 | 159 | 180 | 202 | 204 | 205 | 247 |
| 31.40 | 116.32 | 145 | 151 | 159 | 178 | 200 | 202 | 203 | 247 |
| 31.07 | 116.95 | 143 | 149 | 157 | 175 | 200 | 202 | 203 | 245 |
| 31.78 | 117.30 | 145 | 151 | 159 | 180 | 203 | 205 | 206 | 247 |
| 31.62 | 117.87 | 145 | 151 | 159 | 178 | 203 | 205 | 206 | 247 |
| 30.53 | 117.05 | 142 | 148 | 156 | 173 | 198 | 200 | 201 | 244 |
| 33.83 | 115.77 | 174 | 180 | 185 | 200 | 213 | 215 | 216 | 267 |
| 33.63 | 116.93 | 172 | 172 | 180 | 199 | 210 | 212 | 213 | 260 |
| 40.63 | 117.45 | 174 | 180 | 184 | 202 | 231 | 233 | 234 | 271 |
| 40.53 | 117.05 | 174 | 179 | 183 | 205 | 230 | 232 | 233 | 270 |
| 38.85 | 115.00 | 168 | 173 | 177 | 201 | 221 | 223 | 224 | 265 |
| 38.02 | 115.35 | 169 | 175 | 181 | 202 | 220 | 222 | 223 | 273 |
| 38.47 | 115.05 | 169 | 174 | 178 | 199 | 221 | 223 | 224 | 269 |
| 38.00 | 115.03 | 157 | 167 | 174 | 192 | 221 | 223 | 224 | 271 |
| 37.47 | 114.83 | 166 | 171 | 180 | 199 | 220 | 222 | 223 | 272 |
| 36.93 | 114.10 | 172 | 179 | 183 | 214 | 220 | 222 | 223 | 282 |
| 36.92 | 115.33 | 162 | 171 | 177 | 207 | 219 | 221 | 222 | 267 |
| 39.80 | 116.60 | 175 | 181 | 183 | 208 | 229 | 231 | 232 | 278 |
| 39.08 | 116.42 | 172 | 178 | 183 | 207 | 223 | 225 | 226 | 274 |
| 39.83 | 117.17 | 173 | 180 | 183 | 202 | 227 | 229 | 230 | 273 |
| 39.20 | 116.63 | 171 | 178 | 182 | 200 | 224 | 226 | 227 | 272 |
| 40.60 | 117.13 | 174 | 180 | 182 | 201 | 231 | 233 | 234 | 271 |
| 40.12 | 118.25 | 172 | 179 | 183 | 207 | 230 | 232 | 233 | 283 |
| 40.18 | 119.27 | 179 | 185 | 183 | 209 | 232 | 234 | 235 | 281 |
| 38.75 | 116.13 | 169 | 174 | 180 | 205 | 221 | 223 | 224 | 266 |
| 36.20 | 114.62 | 170 | 176 | 174 | 208 | 220 | 222 | 223 | 263 |
| 35.52 | 114.47 | 164 | 171 | 180 | 199 | 218 | 220 | 221 | 267 |
| 36.55 | 114.58 | 143 | 150 | 158 | 190 | 219 | 221 | 222 | 263 |
| 36.17 | 115.02 | 156 | 162 | 167 | 201 | 219 | 221 | 222 | 261 |
| 34.30 | 113.38 | 156 | 163 | 166 | 190 | 215 | 217 | 218 | 265 |
| 35.20 | 114.08 | 157 | 163 | 165 | 191 | 218 | 220 | 221 | 263 |
| 34.88 | 115.30 | 161 | 171 | 170 | 199 | 214 | 216 | 217 | 266 |
| 33.08 | 112.43 | 162 | 167 | 171 | 194 | 213 | 215 | 216 | 252 |
| 33.05 | 112.97 | 163 | 168 | 174 | 199 | 212 | 214 | 215 | 259 |
| 33.00 | 114.03 | 160 | 165 | 173 | 183 | 213 | 215 | 216 | 253 |
| 34.75 | 116.10 | 162 | 168 | 171 | 199 | 214 | 216 | 217 | 257 |
| 34.17 | 119.25 | 178 | 183 | 190 | 209 | 213 | 215 | 216 | 269 |
| 34.47 | 118.10 | 173 | 178 | 182 | 200 | 215 | 217 | 218 | 268 |

|       |        |     |     |     |     |     |     |     |     |
|-------|--------|-----|-----|-----|-----|-----|-----|-----|-----|
| 36.80 | 116.60 | 166 | 172 | 179 | 209 | 220 | 222 | 223 | 238 |
| 37.63 | 117.18 | 172 | 176 | 180 | 209 | 221 | 223 | 224 | 241 |
| 36.27 | 117.25 | 177 | 183 | 186 | 211 | 218 | 220 | 221 | 242 |
| 36.50 | 120.00 | 172 | 180 | 184 | 218 | 221 | 223 | 224 | 246 |
| 37.55 | 121.17 | 178 | 183 | 187 | 212 | 225 | 227 | 228 | 249 |
| 35.42 | 115.72 | 169 | 178 | 182 | 204 | 215 | 217 | 218 | 236 |
| 35.75 | 116.97 | 174 | 179 | 181 | 202 | 217 | 219 | 220 | 243 |
| 35.97 | 119.38 | 175 | 181 | 185 | 209 | 220 | 222 | 223 | 241 |
| 40.17 | 117.47 | 171 | 177 | 180 | 201 | 229 | 231 | 232 | 244 |
| 39.52 | 117.52 | 179 | 184 | 186 | 211 | 217 | 219 | 220 | 245 |
